# Supplementary material for: PIN-LIKES Coordinate Brassinosteroid Signaling with Nuclear Auxin Input in Arabidopsis thaliana
Source: PubMed Central journal article supplement (PMC7198975; doi:10.1016/j.cub.2020.02.002), 2020-05-04
Supplement: mmc1.pdf [file mmc1.pdf]

Current Biology, Volume 30

**Supplemental Information**

**PIN-LIKES Coordinate Brassinosteroid Signaling**

**with Nuclear Auxin Input in *Arabidopsis thaliana***

**Lin Sun, Elena Feraru, Mugurel I. Feraru, Sascha Waidmann, Wenfei Wang, Gisele Passaia, Zhi-Yong Wang, Krzysztof Wabnik, and Jürgen Kleine-Vehn**

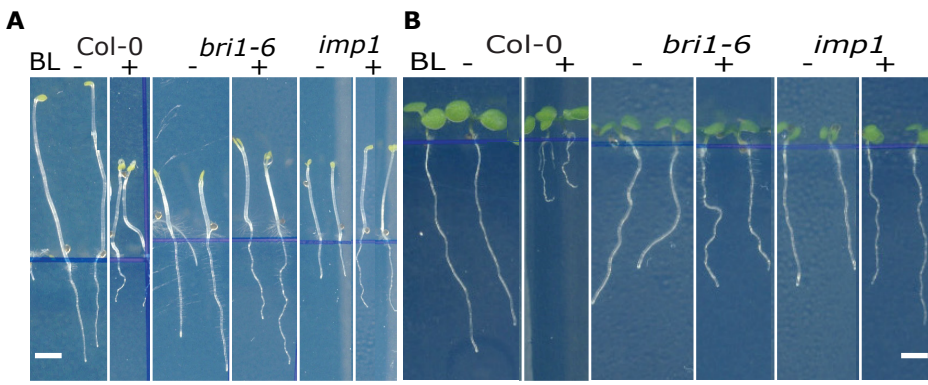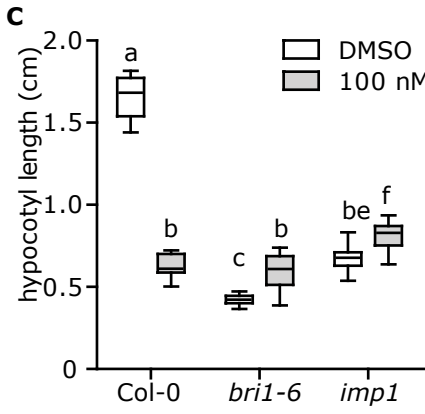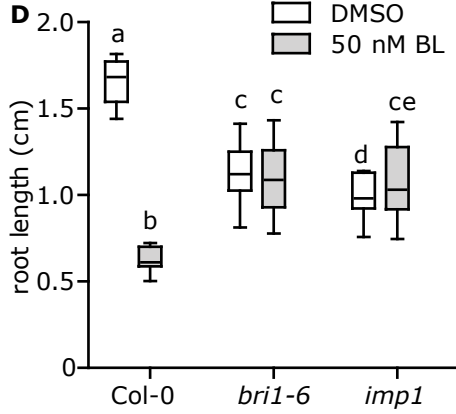

**E** Col-0 PILS5OE *imp1*; PILS5OE *bri1-6*; PILS5OE *bri1-6*

**F** Col-0 PILS5OE *imp1*; PILS5OE *bri1-6*; PILS5OE *bri1-6*

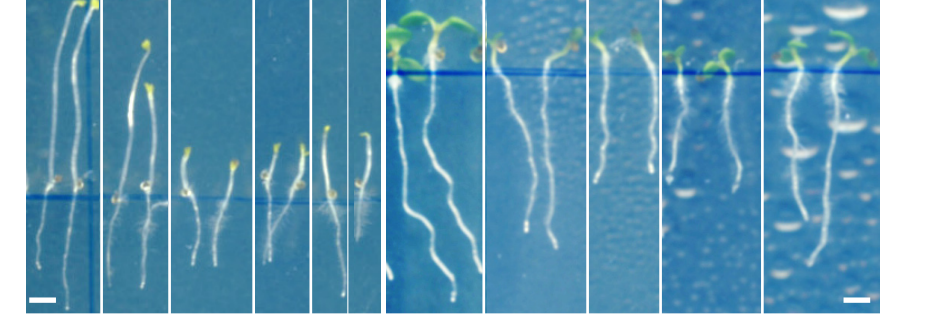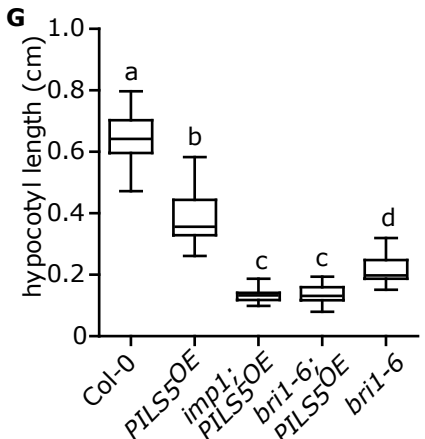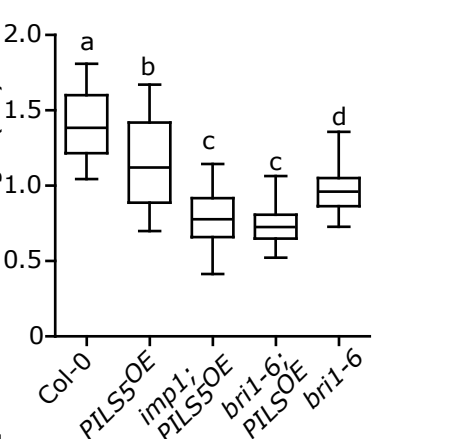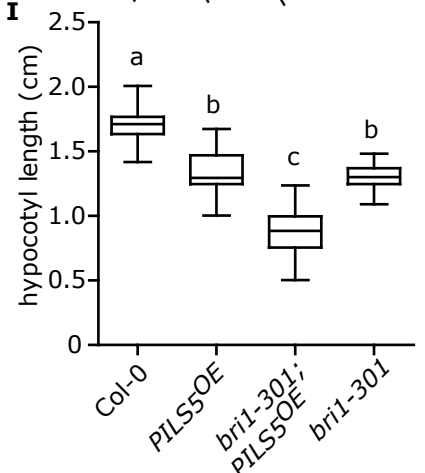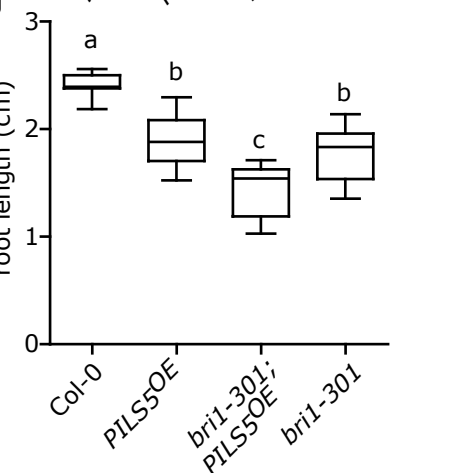

**Figure S1. Impaired BR perception enhances *PILS5<sup>OE</sup>* phenotypes. Related to Figure 2.**

(A-D) Images and quantifications of 5-d-old dark-grown (A, C) and 6-d-old light-grown (B, D) seedlings of wild type (Col-0/WT), *bri1-6* and *imp1* germinated on plates with DMSO, 100 nM (A, C), or 50 nM BL (B, D). (n > 25). Scale bar, 3 mm. (E-H) Scanned images and quantifications of 5-d-old dark-grown (E, G) and 6-d-old light-grown (F, H) seedlings of WT, *PILS5<sup>OE</sup>*, and *bri1* mutants. (n > 25). Scale bar, 3 mm. (I and J) Quantifications of 5-d-old dark-grown (I) and 6-d-old light-grown (J) seedlings of WT, *PILS5<sup>OE</sup>*, and *bri1-301* mutants. Letters indicate values with statistically significant differences (P < 0.05, two-way ANOVA (C and D); P < 0.01, one-way ANOVA (G-J)).



**Figure S2. Predicted BZR1 and BZR2 binding motifs in the promoters of *PILS2*, *PILS3*, and *PILS5*. Related to Figure 3.**

Here, we have used JASPAR [54] which is an open-access database of curated, non-redundant transcription factor (TF) binding profiles stored as position frequency matrices (PFMs) and TF flexible models (TFFMs). JASPAR proposed certain probability of BZR binding for *pPILS2* ( $p > 89\%$ ), *pPILS3* ( $p > 80\%$ ), and *pPILS5* ( $p > 90\%$ ) promoters. The *in silico* predicted G boxes, containing the core E-box motif (ACGT) and/or BZR motif (CGTG), are depicted in yellow (for BZR1) and blue (for BZR2) in *PILS2*, *PILS3*, and *PILS5* promoter sequences.

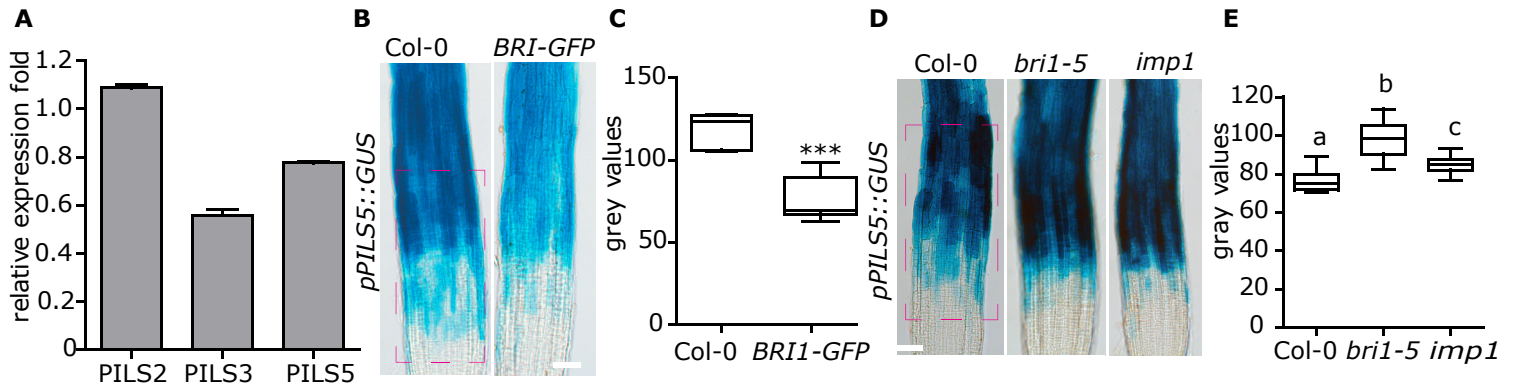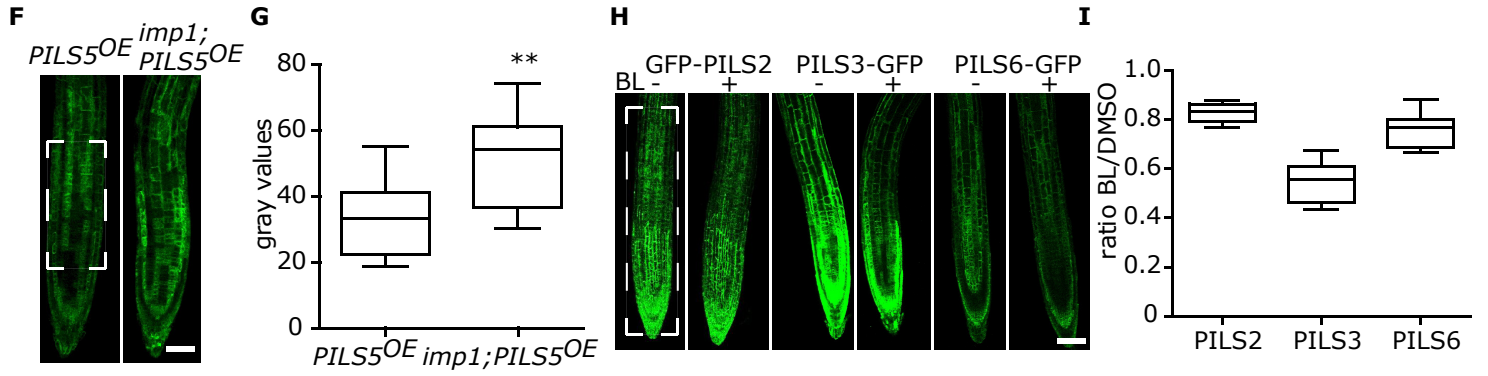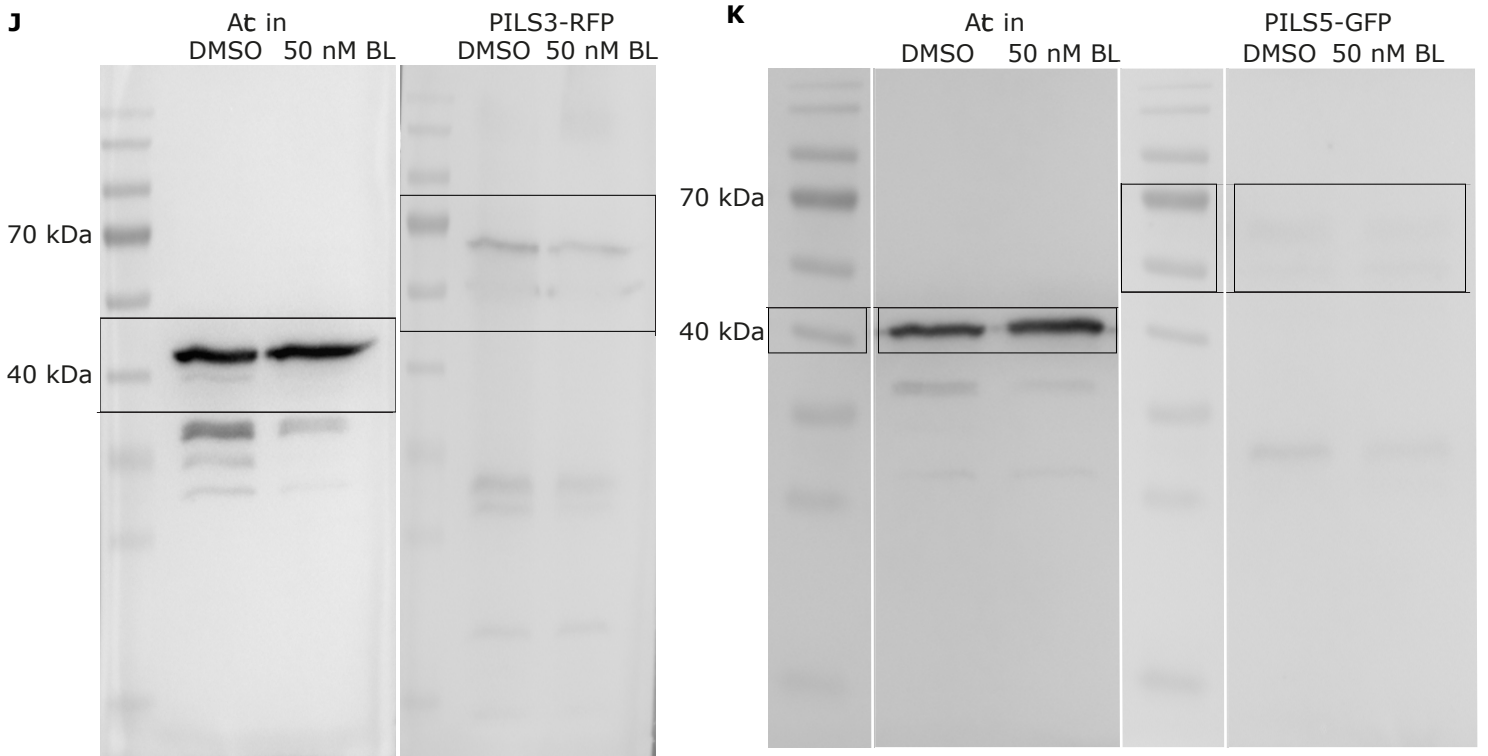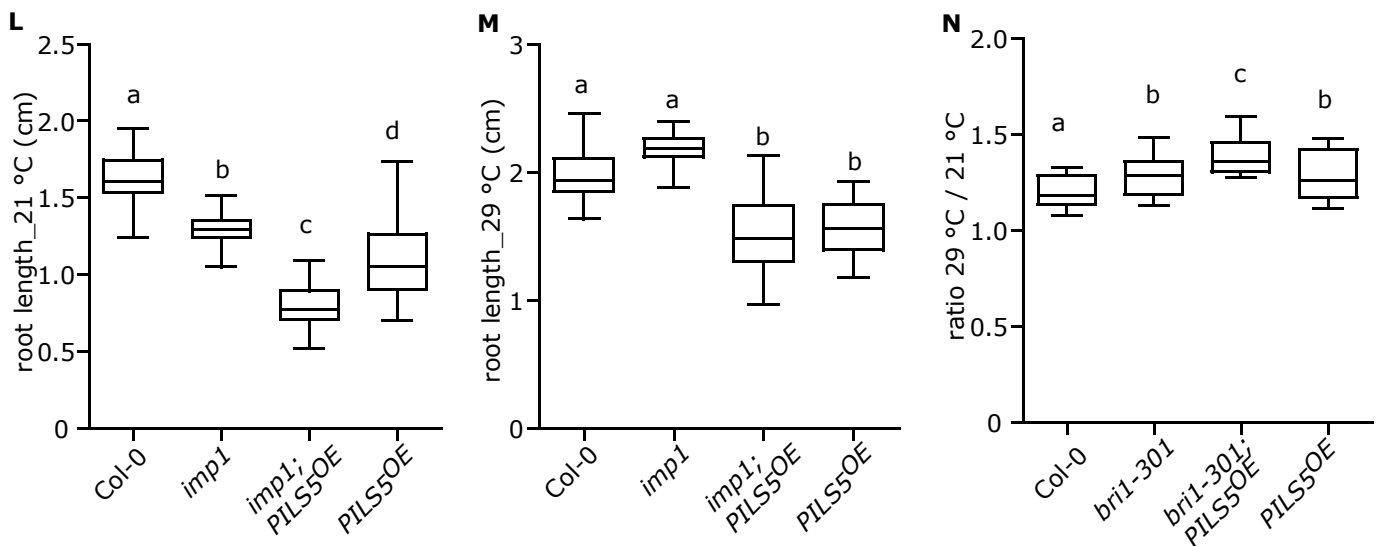

**Figure S3. BR signaling negatively impacts on the PILS transcription and protein abundance.**  
**Related to Figure 3.**

(A) *PILS* gene expression fold changes in 6-d-old light-grown roots of WT after 2 h of 50 nM BL application. (B-E) GUS images (B, D) and quantifications (C, E) of *pPILS5::GUS* expression pattern in roots of wild type, *BRI1-GFP* overexpressor (B, C), *bri1-5*, and *imp1* (D, E). (n = 8). Scale bars, 140  $\mu$ m. (F and G) Confocal images (F) and quantifications (G) of *35S::PILS5-GFP* in 3-d-old roots of WT and *imp1* mutant. (n = 8). Scale bar, 25  $\mu$ m. (H and I) Confocal images (H) and quantifications (I) of *35S::GFP-PILS2*, *35S::GFP-PILS3*, and *35S::PILS6-GFP*, which were transferred to plates containing DMSO (solvent control) or 50 nM BL for 5 h. (n = 8). Scale bar, 25  $\mu$ m. (J and K) Unprocessed immunoblot using anti-RFP and anti-GFP antibody. See also Figure 3N, 3O. (L-N) Quantifications and relative quantification of 7-d-old root segments of WT, *PILS5<sup>OE</sup>*, and *bri1* mutants, which were transferred to 21°C (control) and 29°C (HT) for additional 3 days. (n > 25). The dashed boxes represent the ROIs used to quantify the signal intensity. Stars and letters indicate values with statistically significant differences (\*\*P < 0.01, \*\*\*P < 0.001, student *t*-test (C and G); P < 0.01, one-way ANOVA (E, L-N)).

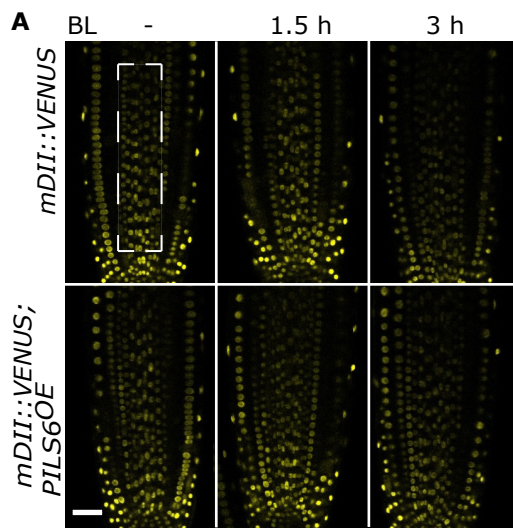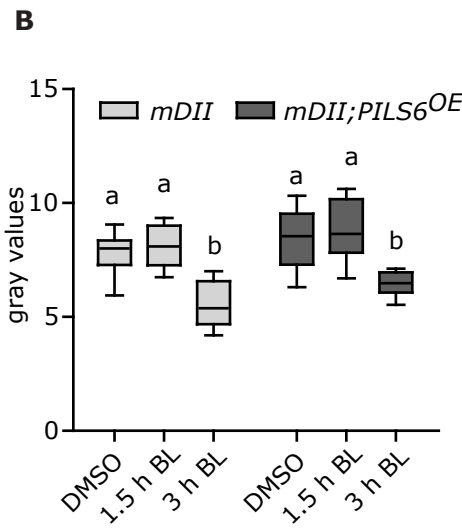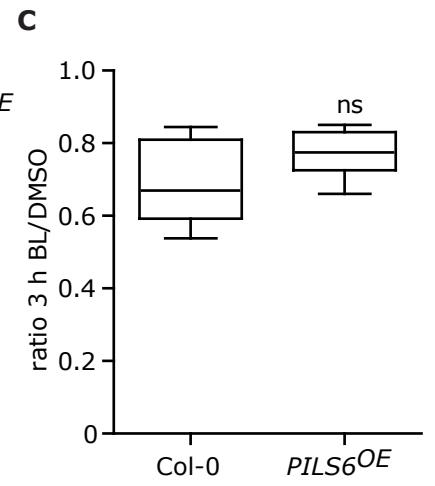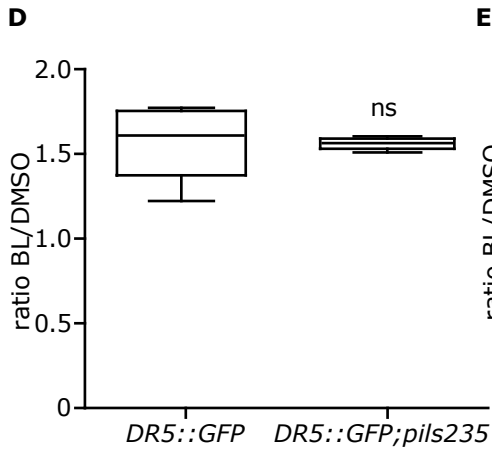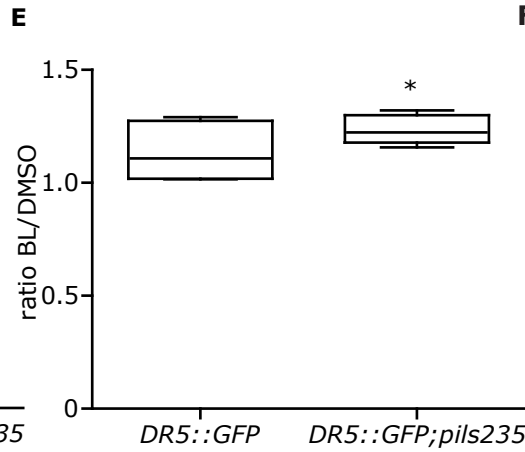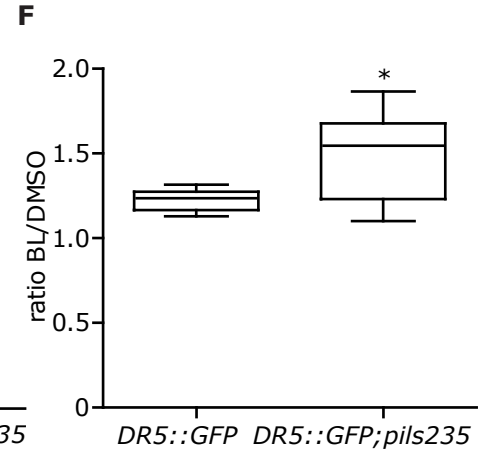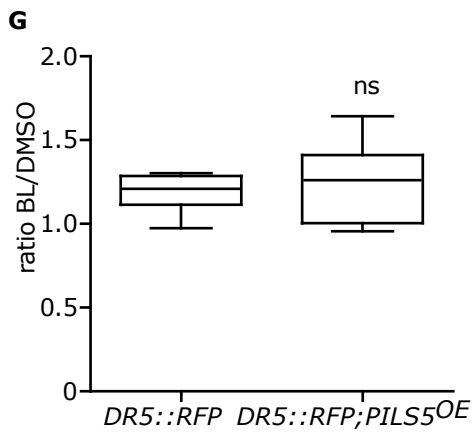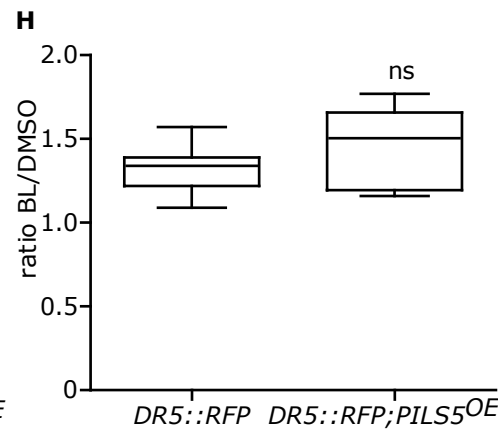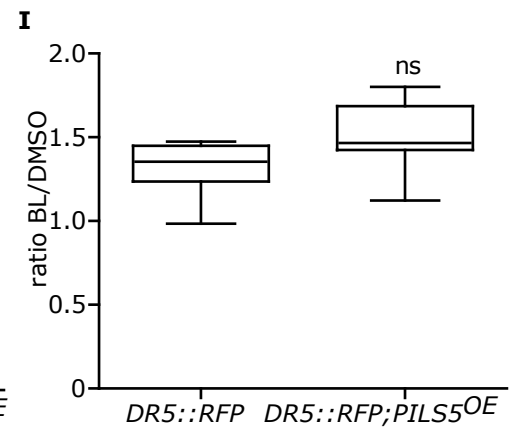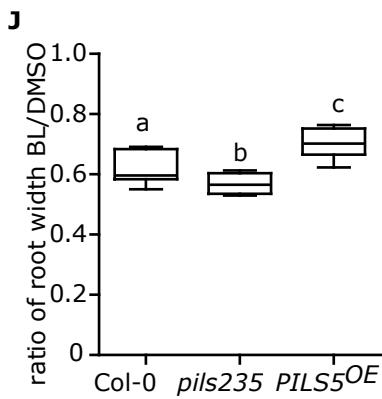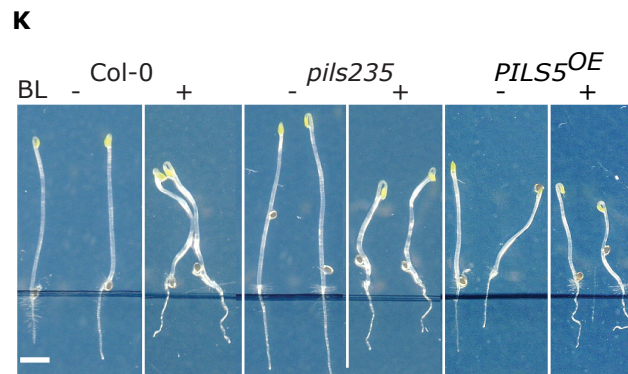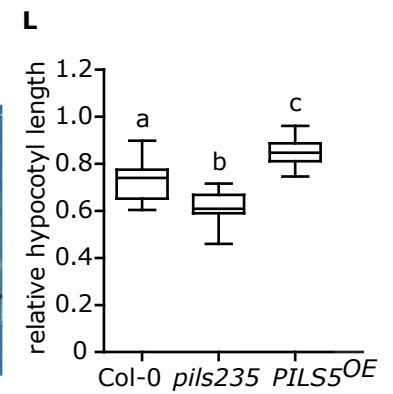



**Figure S4. PILS proteins define nuclear auxin responses. Related to Figure 4 and Figure 5.**

(A-C) Confocal images (A) and quantifications (B, C) of *mDII-VENUS* in WT and in *PILS6<sup>OE</sup>* after 1.5 h and 3 h of BL application. (n > 8). Scale bars, 25  $\mu$ m. The dashed boxes represent the ROIs used to quantify signal intensity. (D-I) Quantification (ratios) of *DR5::GFP* (D-F) or *DR5::RFP* (G-I) in three replicates, showing a relative increase in auxin response in roots of *pils235* (D-F), but no relative difference in *PILS5<sup>OE</sup>* (G-I) when treated with 50 nM BL. (n = 8). D and G is the ratios of Figure 4M and 4N, respectively. (J) Quantification of root widths in the meristematic region of 6-d-old light-grown WT, *pils235*, and *PILS5<sup>OE</sup>* roots. (K and L) Scanned images (K) and quantifications (L) of 5-d-old dark-grown hypocotyls of WT, *pils235*, and *PILS5<sup>OE</sup>* germinated on plates with DMSO or 100 nM BL. (n > 25). Scale bar, 3 mm. Letters and stars indicate values with statistically significant differences (\*P < 0.01, student's *t*-test (C-I), ns: no significant difference; P < 0.01, one-way ANOVA (B, J, and K)).

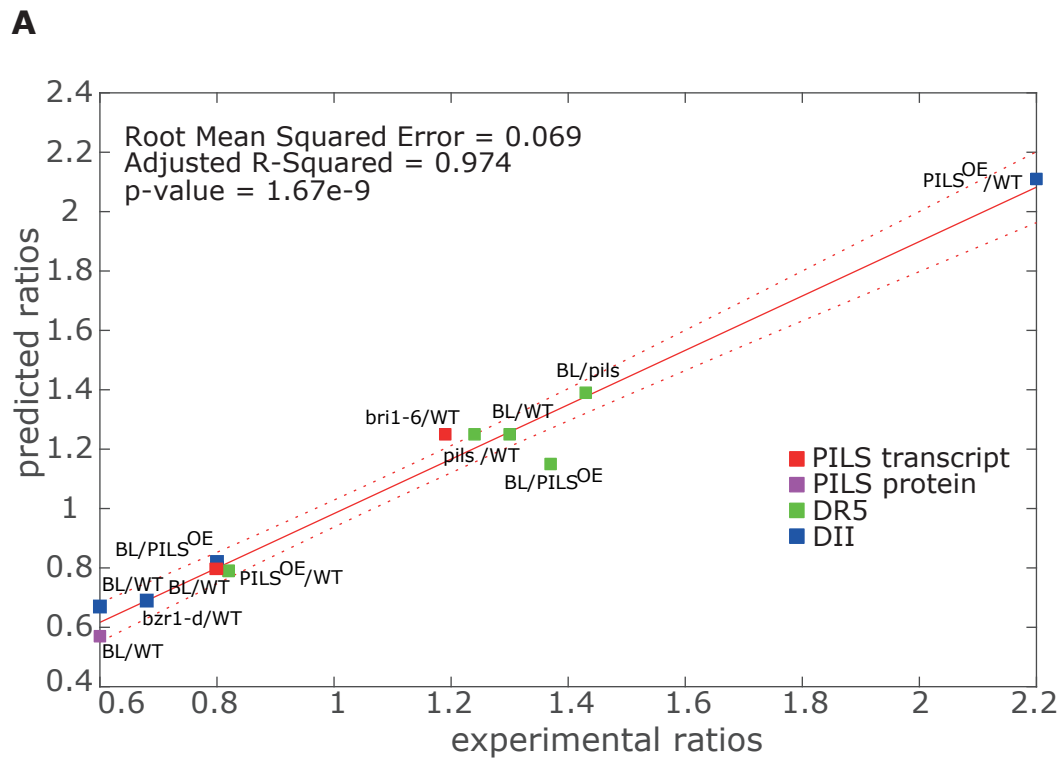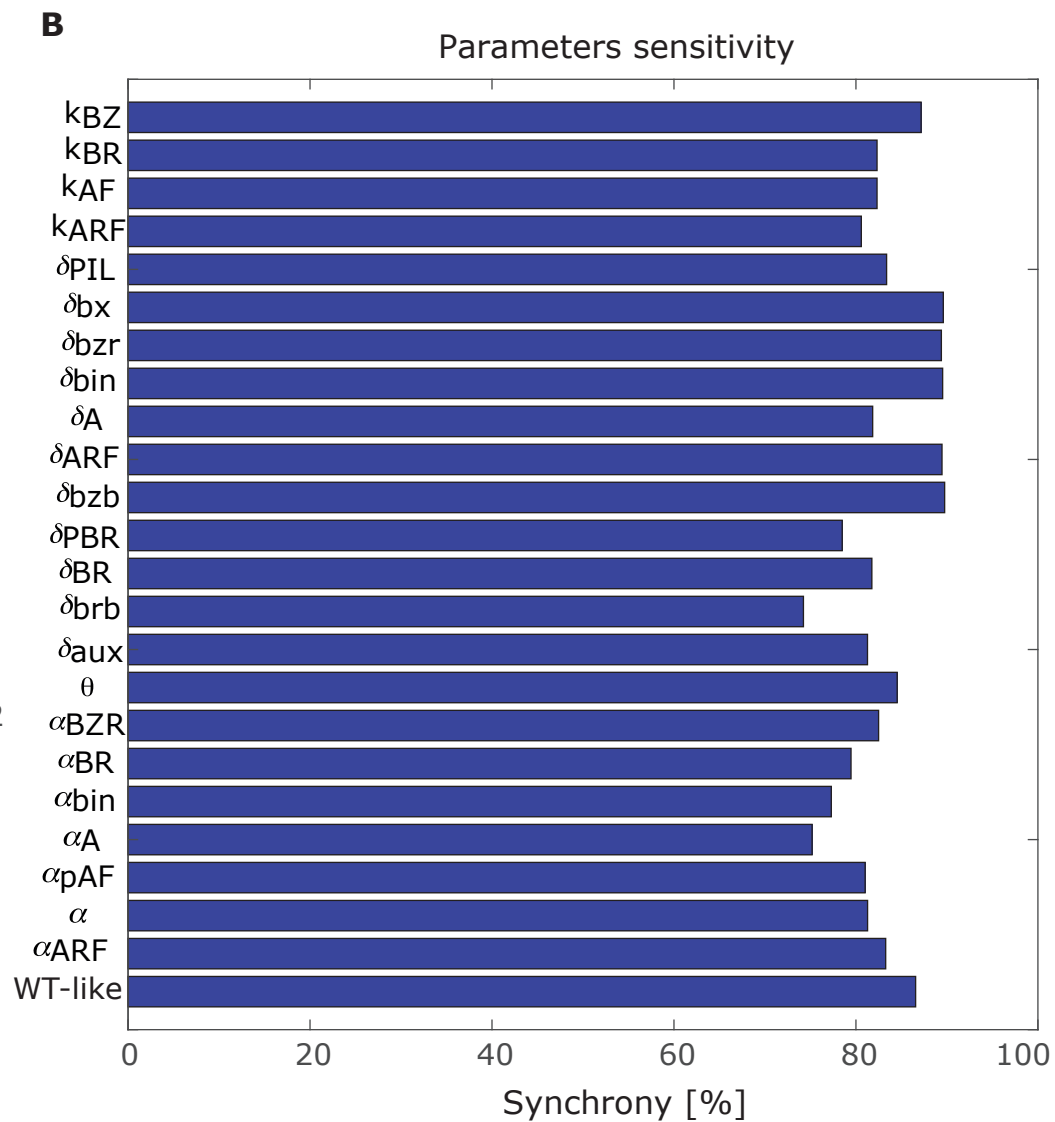

**Figure S5. Estimation of model parameters and testing of model robustness to noise. Related to Figure 6.**

(A and B) Depict parameter estimation fitness plot. Each predicted ratio was compared to experimental observations to fit a global linear regression model (A) and model robustness based on +/- 25% variation of parameters (B). Synchrony of auxin and BR signaling was plotted against each parameter.

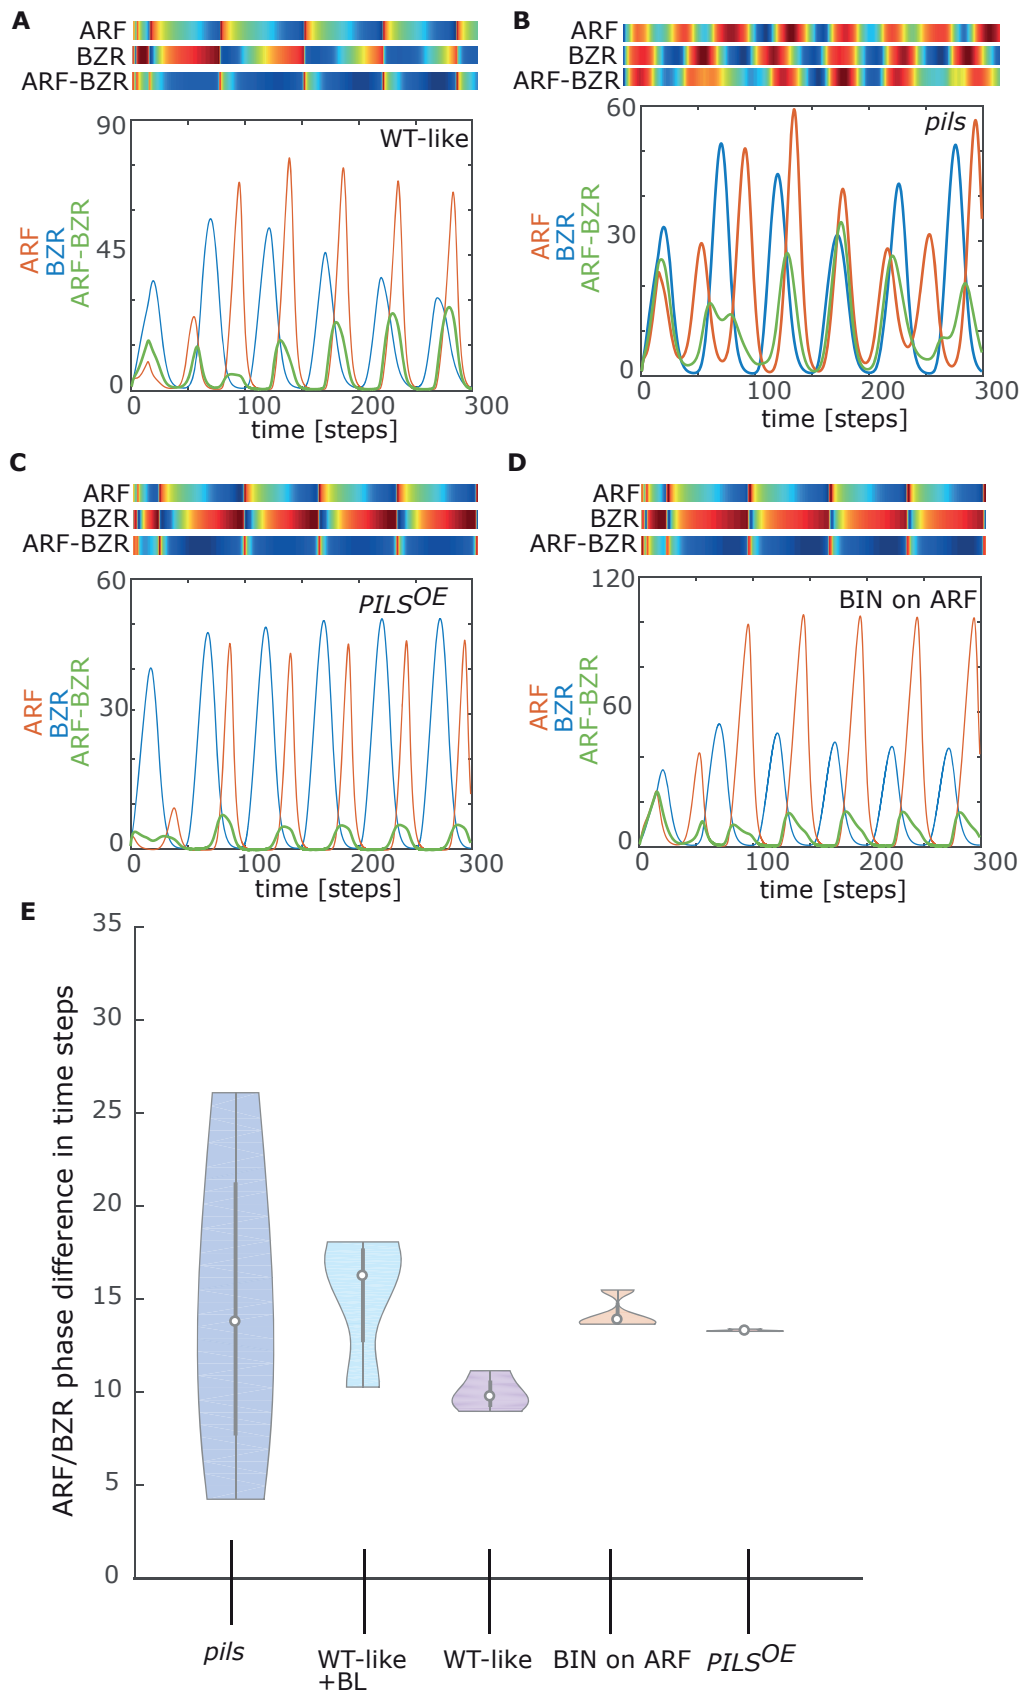

**Figure S6. Simulations of computer model predicts the phase locking between BR and auxin signaling outputs through PILS-dependent auxin transport. Related to Figure 6.**

(A-D) Model simulations with PILS (A), without PILS-dependent feedback (B) (corresponds to Figure 6A and 6B), as well as with mild (10-fold) *PILS* overexpression (C) and by including BIN2 effect on ARF activation (D). Graphs depict time-lapse for BZR dimers (blue), ARF dimers (red) and ARF-BZR heterodimer (green) levels and corresponding heat maps (blue to red) for peak responses. (E) Violin plots show phase difference between BZR and ARF oscillation, corresponding to model simulations (A-D).

Genotyping primers

pils2-2 FP: ATTGCTCAAGGTGAATCCAT pils2-2 RP: AGACCAATCACGGTTAAACA  
Salk\_LB1-3: ATTTTGCCGATTTTCGGAAC  
pils5-2 FP: CCCTTGTTTGGATCATGGTA pils5-2 RP: TCTTACTGCACCGAAAATGA  
pils3-1 FP: AAAGGCATGACGACGGTTAC pils3-1 RP: AAGAGCGTCTCCAAAATTTGG  
bri1-301-FP: GGAAACCATTGGGAAGATCA bri1-301-RP: GCTGTTTCACCCATCCAA

Cloning primers

pPILS3-ATTB4\_FP: GGGGACAACCTTTGTATAGAAAAGTTGCGGAAGCTAATTCTCTGAGACATAGC  
pPILS3-ATTB1\_RP: GGGGACTGCTTTTTTGTACAACTTGCCTTTTTACTATCAACGCGAGAATC

qRT-PCR primers

PILS2\_qPCR\_FP: GTGATGCTTGTACTTGGTGGTATG  
PILS2\_qPCR\_RP: AACTTGAACATTGGATCTGCTGAG  
PILS3\_qPCR\_FP: AGGCGACCATGCAAGTGTTG  
PILS3\_qPCR\_RP: GTGGTACAGCTAGATGACAGTGAG  
PILS5\_qPCR\_FP: TCAGACGGTTACTTGAAGACA  
PILS5\_qPCR\_RP: GAAATGTAAGTCCCATGTTACC  
ACTIN2\_qPCR\_FP: ATTCAGATGCCAGAAAGTCTTGTTT  
ACTIN2\_qPCR\_RP: GCAAGTGCTGTGATTTCTTTGCTCA

ChIP-qPCR primers

IAA19 ChIP-F: GGGAATTTGGTTTACCAGGATG  
IAA19 ChIP-R: CTCAAGTATTGGGTTGAATTTTACTTAG  
PILS2 ChIP-F: CCGCCGATTCATGCTTTTTAAT  
PILS2 ChIP-R: AGACGACAAAAGGGAACGCT  
PILS5 ChIP-F: TAATCAGAGGCTACGACGGC  
PILS5 ChIP-R: CGAAAACAACTAAATCCCAACTCA  
UBC30 ChIP-F: CAAATCCAAAACCCTAGAAACCGAA  
UBC30 ChIP-R: AACGACGAAGATCAAGAACTGGGAA

**Table S1. Primers used in this study. Related to STAR Methods.**
